## Logistic proliferation of cells in scratch assays is delayed

Wang Jin<sup>1</sup>, Esha T Shah<sup>2</sup>, Catherine J Penington<sup>1</sup>, Scott W McCue<sup>1</sup>, Philip K Maini<sup>3</sup>, Matthew J Simpson<sup>1</sup>,

**1 School of Mathematical Sciences, Queensland University of Technology (QUT), Brisbane, Australia.**

**2 Ghrelin Research Group, Translational Research Institute, QUT, 37 Kent St, Woolloongabba, Queensland, Australia.**

**3 Wolfson Centre for Mathematical Biology, Mathematical Institute, University of Oxford, Radcliffe Observatory Quarter, Woodstock Road, Oxford, UK.**

\*[matthew.simpson@qut.edu.au](mailto:matthew.simpson@qut.edu.au)

### Abstract

Scratch assays are used to study how a population of cells re-colonises a vacant region on a two-dimensional substrate after a cell monolayer is scratched. These experiments are used in many applications including drug design for the treatment of cancer and chronic wounds. To provide insights into the mechanisms that drive scratch assays, the solution of continuum reaction-diffusion models have been calibrated to data from scratch assays. These models typically include a logistic source term to model carrying capacity-limited proliferation, however the choice of using a logistic source term is often made without examining whether it is valid. Here we study the proliferation of PC-3 prostate cancer cells in a scratch assay, and we focus on the proliferation of these cells far away from the scratch. All experimental results for the scratch assay are compared with equivalent results from a proliferation assay where the cell monolayer is not scratched. Visual inspection of the evolution of the cell density as a function of

time reveals a series of sigmoid curves that could be naively calibrated to the solution 13  
of the logistic growth model. However, careful analysis of the per capita growth rate 14  
as a function of density reveals several key differences between the proliferation of cells 15  
in scratch and proliferation assays. The per capita growth rate in the proliferation 16  
assay decreases, approximately linearly, with density in the proliferation assay 17  
suggesting that the logistic growth model is valid for the entire duration of the 18  
proliferation assay. However, the per capita growth rate in the scratch assay increases 19  
with density when the density is sufficiently small in the scratch assay, suggesting that 20  
the logistic growth model does not apply. Instead, guided by data, we find that there 21  
are two phases of proliferation in a scratch assay. At short time we have a *disturbance* 22  
*phase* where proliferation is not logistic, and this is followed by a *growth phase* where 23  
proliferation appears to be logistic. Accounting for the differences in the growth and 24  
disturbance phase, we obtain biologically realistic estimates of the proliferation rate 25  
and carrying capacity density. In contrast, simply calibrating the solution of the 26  
logistic growth equation to all data from the scratch assays, we obtain an excellent 27  
match between the data and the model, but the parameter estimates vary wildly and 28  
are not biologically realistic. Overall our study shows that simply calibrating the 29  
solution of a continuum model to a scratch assay might produce misleading parameter 30  
estimates, and this issue can be resolved by making a distinction between the 31  
disturbance and growth phases. Repeating our procedure for other scratch assays will 32  
provide insight into the roles of the disturbance and growth phases for different cell 33  
lines and scratch assays performed on different substrates. 34

## Introduction

*In vitro* scratch assays are routinely used to study the ability of cell populations to re-colonise an initially-vacant region [1–4]. This re-colonisation occurs as a result of the combination of cell migration and cell proliferation, and gives rise to moving fronts of cells that re-colonise the vacant region. Scratch assays provide insights into both cancer spreading and tissue repair processes [3, 5, 6]. In general, performing a scratch assay involves three steps: (i) growing a monolayer of cells on a two-dimensional substrate; (ii) creating a vacant region in the monolayer by scratching it with a sharp-tipped instrument; and, (iii) imaging the re-colonisation of the scratched region [1, 3]. Another type of *in vitro* assay, called a proliferation assay, is performed using the exact same procedure as a scratch assay, except that the monolayer of cells is not scratched [2, 7, 8]. Cell proliferation assays allow experimentalists to measure the increase in cell numbers over time due to proliferation [2].

In the applied mathematics literature, scratch assays have been modelled using continuum reaction–diffusion equations [5, 6, 9–16]. In these models, cell migration is represented by a diffusion term, and carrying–capacity limited proliferation is represented by a logistic source term. For proliferation assays in which the cell population is uniformly distributed and no scratch is made, the continuum reaction–diffusion equation simplifies to the logistic growth equation [8, 10, 16], given by

$$\frac{dC(t)}{dt} = \lambda C(t) \left( 1 - \frac{C(t)}{K} \right), \quad (1)$$

where  $C(t)$  is the density of cells,  $t$  is time,  $\lambda > 0$  is the proliferation rate, and  $K > 0$  is the carrying capacity density.

It is interesting to note that a logistic growth term is often used when modelling scratch assays or proliferation assays [2, 5, 6, 10–12, 15, 16], yet the suitability of this choice is rarely, if ever, tested using experimental data. In fact, several studies argue that the logistic growth equation does not always match experimental data [15, 17–19]. For example, Laird [17] examines *in vivo* tumour growth data and shows that the Gompertz growth law matches the data better than the standard logistic model. Similarly, West and coworkers investigate the growth patterns of a wide range of

animal models [19]. By comparing experimental data with model predictions, they find that the growth is best described by a more general model. In addition, the results from our previous study, focusing on scratch assays, suggest that when calibrating solutions of a logistic-type reaction-diffusion equation to experimental data with varying initial cell density, there appears to be no unique value of  $\lambda$  for which the logistic growth equation matches the entire data set for all initial cell densities [15]. One way of interpreting this result is that the cells in the scratch assay do not proliferate logistically.

In the present work, we use a combined experimental and mathematical approach to investigate whether the proliferation of cells in a scratch assay can be modelled with the classical logistic equation. Our approach involves performing a series of proliferation assays to act as a control so that we can examine whether the process of scratching the monolayer affects the way that cells proliferate. While many experimental studies implicitly assume that scratching the monolayer does not affect cell proliferation, others suggest the process of scratching can trigger certain signalling pathways that may have some effects on the way that cells proliferate [20,21]. To investigate these questions, we perform a suite of scratch assays and proliferation assays using the IncuCyte ZOOM™ system [16]. For both types of assays, we use the PC-3 prostate cancer cell line [22], and we consider varying the initial seeding condition so that we can examine the influence of varying the initial cell density.

To quantitatively test the suitability of the logistic growth model, we extract cell density information from the experimental images and then estimate the per capita growth rates from the data for both the scratch assays and the proliferation assays. Our results show that the evolution in cell density in the proliferation assays appears to be logistic for the entire duration of the experiment. In contrast, the variation in cell density in the scratch assays is very different. We observe two phases in the scratch assays: (i) a disturbance phase at early time, in which the proliferation of cells is not logistic; and, (ii) a classic logistic growth phase for the remainder of the experiment. The differences how cells proliferate in the scratch assay and the proliferation assay is surprising because we are making observations well away from the location of the scratch. This finding that we have two phases of proliferation in scratch assays is significant because many mathematical studies implicitly assume that

cells in scratch assays proliferate logistically for the entire duration of the 95  
experiment [2, 5, 6, 10–12, 15, 16]. However, our finding is that cells located far away 96  
from the scratch proliferate very differently to cells in the proliferation assay. 97

This paper is organised in the following way. First, we describe the experimental 98  
methods, including how we process the experimental images to obtain cell density 99  
information. We then outline the logistic growth model and the least-squares method 100  
for calibrating the model to our data. By presenting information about the evolution 101  
of the cell density and the per capita growth rate, we identify two phases of 102  
proliferation in the scratch assays. These phases are identified by focusing on regions 103  
of the scratch assay that are located well behind the location of the scratch. After 104  
calibrating the solution of the logistic model to the cell density information, our 105  
results suggest that the logistic equation is relevant for the proliferation assays but 106  
only for the later phase in the scratch assays. We conclude this study by discussing 107  
some of the limitations, and we outline some extensions for future work. 108

## Methods 109

### Experimental methods 110

We perform scratch assays and proliferation assays using the IncuCyte ZOOM™ live 111  
cell imaging system (Essen BioScience, MI USA). All experiments are performed using 112  
the PC-3 prostate cancer cell line [22]. These cells, originally purchased from 113  
American Type Culture Collection (Manassas, VA, USA), are a gift from Lisa Chopin 114  
(April, 2016). The cell line is used according to the National Health and Medical 115  
Research Council (NHMRC) National statement on ethical conduct in human research 116  
with ethics approval for Queensland University of Technology Human Research Ethics 117  
Committee (QUT HREC 59644, Chopin). Cells are propagated in RPMI 1640 medium 118  
(Life Technologies, Australia) with 10% foetal calf serum (Sigma-Aldrich, Australia), 119  
100U/mL penicillin, and 100µg/mL streptomycin (Life Technologies), in plastic tissue 120  
culture flasks (Corning Life Sciences, Asia Pacific). Cells are cultured in 5% CO<sub>2</sub> and 121  
95% air in a Panasonic incubator (VWR International) at 37°C. Cells are regularly 122  
screened for *Mycoplasma* (Nested PCR using primers from Sigma-Aldrich). 123

Cell counting is performed using a Neubauer-improved haemocytometer 124

(ProSciTech, Australia). Cells, grown to approximately 80% confluence, are removed from the flask using TrypLE™ (Life Technologies) in phosphate buffered saline (pH 7.4) and resuspended in culture medium ensuring that they are thoroughly mixed. After resuspension, an aliquot of 10μL is quickly removed before the cells start to settle. A 1:1 mixture of cell suspension and 0.4% trypan blue solution (Sigma–Aldrich; a blue stain that is only absorbed by dead cells) is prepared and 10μL of the solution is loaded onto the counting chamber of a clean Neubauer–improved haemocytometer. The counting chamber of a haemocytometer is delineated by grid lines that identify four chamber areas to be used in cell counting. The volume of the chamber area is  $1 \times 10^4$  mL. Using a microscope, each chamber area is viewed, and the live cells that are not coloured in blue are counted. The cell density is calculated by taking the average of the four readings and multiplying it by  $10^4$  and the dilution factor, to obtain the approximate number of cells per mL of the cell suspension [23].

For the proliferation assays, the cell count is determined and the cells are seeded at various densities in 96–well ImageLock plates (Essen Bioscience). Cells are distributed in the wells of the tissue culture plate as uniformly as possible. We report results for initial seeding densities of approximately 12,000, 16,000 and 20,000 cells per well. After seeding, cells are grown overnight to allow for attachment and some subsequent growth. The plate is placed into the IncuCyte ZOOM™ apparatus, and images are recorded every two hours for a total duration of 48 hours. An example of a set of experimental images from a proliferation assay is shown in Fig 1A–C. For each initial seeding condition we perform 16 identically prepared experimental replicates ( $n = 16$ ).

For the scratch assays, the cell count is determined and the cells are seeded at various densities in 96–well ImageLock plates (Essen Bioscience). Cells are distributed in the wells of the tissue culture plate as uniformly as possible. We report results for initial seeding densities of approximately 12,000, 16,000 and 20,000 cells per well. After seeding, cells are grown overnight to allow for attachment and some subsequent growth. We use a WoundMaker™ (Essen BioScience) to create uniform scratches in each well of a 96–well ImageLock plate. To ensure that all cells are removed from the scratched region, a modification is made to the manufacturer’s protocol, where the scratching motion is repeated 20 times over a short duration before lifting the WoundMaker™. After creating the scratch, the medium is aspirated and the wells are

washed twice with fresh medium to remove any cells from the scratched area. 157  
Following the washes, 100 $\mu$ L fresh medium is added to each well and the plate is 158  
placed into the IncuCyte ZOOM<sup>TM</sup> apparatus. Images of the collective cell spreading 159  
are recorded every two hours for a total duration of 48 hours. An example of a set of 160  
experimental images taken from a scratch assay is shown in Fig 1D–F. For each initial 161  
seeding condition we perform 16 identically prepared experiments in different wells of 162  
the tissue culture plate ( $n = 16$ ). Throughout this work we will refer to these 163  
identically prepared experiments in different wells as different *replicates*. 164

### Experimental image processing 165

To obtain cell density information from the experimental images, we count the number 166  
of cells in two identically sized subregions that are well behind the location of the 167  
scratch, as shown in Fig 1G. The positions of the two subregions are located about 168  
400 $\mu$ m behind the scratch, and each subregion has dimensions 1430 $\mu$ m $\times$ 200 $\mu$ m. 169  
Throughout this work, we refer to the subregion to the left of the image as subregion 170  
1, and the subregion to the right of the image as subregion 2. Because the subregions 171  
are located well away from the scratched region, we are able to invoke a simplifying 172  
assumption that the dynamic changes in cell density in these subregions is due to cell 173  
proliferation alone (Supplementary Material) [16]. We do not use data that are 174  
directly adjacent to the left or right sides of the images since this corresponds to the 175  
boundary of the field of view. Cells in each subregion are counted in Photoshop using 176  
the ‘Count Tool’ [24]. After counting the number of cells in each subregion, we divide 177  
the total number of cells by the total area to give an estimate of the cell density. We 178  
repeat this process for each replicate and calculate the sample mean of the cell density 179  
at two-hour intervals during the first 18 hours of the experiment where the most rapid 180  
temporal changes take place. Then, during the last 30 hours of the experiment, we 181  
count cells at six-hour intervals. 182

One of the assumptions we make when analysing data from the scratch assay is 183  
that the two subregions are sufficiently far away from the edges of the scratch so that 184  
there are no spatial variations in cell density at these locations for the entire duration 185  
of the experiment. This assumption allows us to attribute any changes in cell density 186  
in the subregions to be a result of cell proliferation [16]. Quantitative evidence to 187

support this assumption is provided in the Supplementary Material. 188

## Mathematical methods 189

The logistic growth equation, given by Eq (1), has an exact solution 190

$$C(t) = \frac{KC(0)}{(K - C(0))e^{-\lambda t} + C(0)}, \quad (2)$$

which is a sigmoid curve that monotonically increases from the initial density  $C(0)$  to 191  
 $K$  as  $t \rightarrow \infty$ . An important feature of the logistic growth model that we will make use 192  
of in this study is that the per capita growth rate,  $(1/C)(dC/dt) = \lambda(1 - C/K)$ , 193  
decreases linearly with  $C$ . 194

We estimate the two parameters in the logistic growth model,  $\lambda$  and  $K$ , by 195  
minimising a least-squares measure of the discrepancy between the solution of the 196  
logistic growth equation and the average cell density information in our subregions 197  
that are located far away from the scratched region. The least-squares error is given by 198

$$E(\lambda, K) = \sum_{i=1}^I [C^{\text{model}}(t_i) - C^{\text{data}}(t_i)]^2, \quad (3)$$

where  $i$  is an index that indicates the number of time points used from the 199  
experimental data sets and  $I$  is the total number of time points used in the calibration 200  
procedure. We calibrate the solution of the logistic growth equation to the average cell 201  
density information using the MATLAB function `lsqcurvefit` [25] that is based on 202  
the Levenberg-Marquardt algorithm. In each case, we always check that our 203  
least-squares estimates of  $\lambda$  and  $K$ , which we denote as  $\bar{\lambda}$  and  $\bar{K}$ , are independent of 204  
the initial estimate that is required for the iterative algorithm to converge. 205

## Results and discussion 206

### Quantitative assessment of experiments 207

#### Initial cell density 208

Many previous studies that calibrate solutions of mathematical models to experimental 209  
data from proliferation or scratch assays make use of just one initial density of 210



cells [2, 5, 6, 10]. To provide a more thorough investigation of the suitability of various 211  
mathematical models, we calibrate mathematical models to a suite of experimental 212  
data where the initial density of cells is intentionally varied [15]. To achieve this, our 213  
experimental procedure involves placing a different number of cells into each well of 214  
the tissue culture plate. We describe this as varying the *initial seeding condition*. In 215  
this work we consider three different initial seeding conditions that correspond to 216  
placing either: (i) 12,000; (ii) 16,000; or, (iii) 20,000 cells per well. For brevity, we 217  
refer to these three conditions as initial seeding conditions 1, 2 and 3, respectively. 218

After a particular number of cells are placed into the tissue culture plate, the cells 219  
are incubated overnight to allow them to attach to the plate and begin to proliferate. 220  
The experiments are then performed on the following day. Since the cell density 221  
changes overnight, we will refer to the initial density of cells at the beginning of the 222  
experiment on the following day, as the *initial cell density*. Intuitively, we expect that 223  
the initial cell density in proliferation assays will be greater than the cell density 224  
associated with the initial seeding condition, because the cells have had a period of 225  
time to attach and begin to proliferate. 226

Before we examine the temporal evolution of cell density in our experiments, we 227  
first examine the variability in the initial cell densities amongst our various 228  
experimental replicates. This is essential, since the process of placing either 12,000, 229  
16,000 or 20,000 cells in each well of the tissue culture place is, at best, an 230  
approximation. To quantify the variability in the initial cell density, we count the 231  
number of cells in the two subregions, as shown in Fig 1G, and convert these counts 232  
into an estimate of the initial cell density,  $C(0)$ . We repeat this procedure for both the 233  
proliferation and scratch assays, giving a total of 96 individual estimates of the initial 234  
cell density. These 96 estimates of the initial cell density are reported in Fig 2, 235  
revealing three features: 236

1. In general, those experiments initiated with a higher number of cells per well 237  
lead to a higher initial cell density after the overnight attachment and 238  
proliferation has taken place; 239
2. Within each initial seeding condition, the variability in initial cell density for the 240  
proliferation assays is very similar to the variability in initial cell density for the 241

scratch assays; and, 242

3. There is a large variation in the initial cell density within each initial seeding 243  
condition. 244

Of these three features, the variation in the initial cell density within each initial 245  
seeding condition is very important. For example, the highest recorded initial cell 246  
density for initial seeding condition 1 (12,000 cells per well) is greater than the 247  
smallest recorded initial cell density for initial seeding condition 3 (20,000 cells per 248  
well). This means that we ought to take great care when selecting particular 249  
experimental replicates from the 96 data sets in Fig 2, otherwise our results could be 250  
misleading when we try to examine how the results depend on the initial cell density. 251

We select three replicates from each initial seeding condition for both the 252  
proliferation and scratch assays so that the initial cell density for the initial seeding 253  
condition 3 is greater than the initial cell density for the initial seeding condition 2, 254  
which is greater than the initial cell density for the initial seeding condition 1. 255  
Furthermore, we select three replicates for both the proliferation and scratch assays 256  
from each initial seeding condition. These choices are made so that the initial cell 257  
density for each type of assay is approximately the same within each seeding 258  
condition. To satisfy these constraints we choose three replicates from each set of 16 259  
experimental replicates. The selected replicates are indicated in Fig 2. 260

### Cell density information 261

Using the previously identified three experimental replicates for each type of assay and 262  
each initial seeding condition (Fig 2), we plot the evolution of the cell density as a 263  
function of time for each experimental replicate, as shown in Fig 3. We also 264  
superimpose, in Fig 3, the evolution of the average cell density for each type of assay 265  
and each initial seeding condition. We see that the differences in initial density 266  
between the proliferation assay and the scratch assay are minimal. The most obvious 267  
trend in the data is that the cell density in both the proliferation assay and the 268  
scratch assay increases dramatically with time, regardless of the initial condition. 269

We note that it could be possible to calibrate the solution of Eq (1) to any of the 270  
density curves in Fig 3, and this approach has been widely used [2, 4, 8, 10]. However, 271

there is no guarantee that simply fitting the solution of the logistic equation to this  
kind of data means that the logistic model describes the underlying mechanism [26].  
To provide further insight into whether the logistic model applies to these data, we  
re-interpret the data in terms of the per capita growth rate.

## Per capita growth rate

To estimate the per capita growth rate,  $(1/C)(dC/dt)$ , we use the cell density data in  
Fig 3 to estimate  $dC/dt$  using a finite difference approximation. Our estimate of  $dC/dt$   
at the first and last time points is obtained using a forward and backward difference  
approximation, respectively, while our estimates at all other time points are obtained  
using an appropriate central difference approximation [27]. With these estimates, we  
plot the per capita growth rate as a function of the density in Fig 4. Results are shown  
for both proliferation and scratch assays, for the three initial densities considered.

To interpret our results, it is instructive to recall that the data in Fig 3 show that  
the cell density, in each type of experiment for all three initial densities of cells,  
increases with time. Therefore, when we interpret each plot showing the per capita  
growth rate as a function of density in Fig 4, it is useful to recall how the data in these  
plots vary with time during the experiment. Data for smaller values of  $C$  in each  
subfigure in Fig 4 correspond to the early part of the experiment, and hence small  $t$ .  
In contrast, data for larger values of  $C$  in each subfigure in Fig 4 correspond to the  
latter part of the experiment, and hence larger  $t$ .

If the logistic growth model is valid, then we expect that the per capita growth rate  
will be a linearly decreasing function of the density. In contrast, other kinds of  
carrying-capacity limited growth models, such as the Gompertz law, imply a  
non-linear relationship [17]. Visual inspection the per capita growth rate data in Fig 4  
reveals several trends:

1. The relationship between the per capita growth rate and the density in the  
proliferation assay is very different to the relationship between the per capita  
growth rate and the density in the scratch assay;
2. The relationship between the per capita growth rate for each proliferation assay,  
at each initial seeding condition, appears to be reasonably well approximated by

a linearly decreasing function of density; and, 302

3. The relationship between the per capita growth rate for each scratch assay is 303  
more complicated, with the per capita growth rate increasing with density when 304  
the density is small, and then decreasing with density when the density is 305  
sufficiently large. 306

These observations suggest that the proliferation of cells in the scratch assay is very 307  
different to the proliferation of cells in a proliferation assay. Because we are examining 308  
the proliferation of cells that are located well away from the scratch, this result implies 309  
that the process of scratching the monolayer can induce non-local effects. 310

The fact that we observe two very different trends in the per capita growth rate 311  
data for the scratch assay motivates us to conjecture that the proliferation of cells in 312  
the scratch assay, far away from the location of the scratch, takes place in two phases. 313  
The first phase, which occurs at small cell densities and at early time, involves the per 314  
capita growth rate increasing with density. This trend is the opposite of what we 315  
expect if the logistic growth model is valid and not what we observe in the 316  
proliferation assay. The second phase, which occurs at larger cell densities and at later 317  
time, involves the per capita growth rate decreasing with the density. These two 318  
phases occur consistently across all three initial seeding conditions (Fig 4B, D and F). 319  
A schematic illustration of the differences observed between the per capita growth rate 320  
in the scratch assay and the proliferation assay is given in Fig 5. In this schematic, we 321  
refer to the first phase in the scratch assay as the *disturbance phase*, and the second 322  
phase in the scratch assay as the *growth phase*. The per capita growth data in the 323  
proliferation assay appear to be similar to the growth phase of the scratch assay for 324  
the entire duration of the experiment. 325

In the schematic in Fig 5, we suggest that the relationship between the per capita 326  
growth rate and the density during the growth phase is a linearly decreasing function, 327  
which is consistent with the logistic model. To quantitatively examine whether this 328  
assumption is valid for our dataset we now fit a series of straight lines to our averaged 329  
per capita growth rate data during the growth phase to see how well the data match a 330  
linearly decreasing relationship between  $(1/C)(dC/dt)$  and  $C$ . 331

Results in Fig 6A, C and E show the averaged per capita growth rate as a function 332

of density for the proliferation assays together with the linear relation of best fit 333  
obtained using `lsqcurvefit` [25]. A visual comparison of the match between the 334  
linear regression and the data suggests that the putative linear relationship is 335  
reasonable. In contrast, it is clear that the per capita growth data in Fig 6B, D and F 336  
for the scratch assays does not follow a linearly decreasing straight line for the entire 337  
duration of the experiment. However, it seems reasonable to investigate whether the 338  
data in the second phase are logistic. To examine this question we need to 339  
quantitatively separate the first and second phases. To do this we separate the data in 340  
Fig 6B, D and F into two groups, the disturbance phase for the period of time up to 341  
18 hours, and the growth phase from 18 hours onwards. To examine whether the data 342  
in the growth phase are logistic we determine the best fit linear relationship using 343  
`lsqcurvefit` [25] for the data in the growth phase. This best fit straight line is 344  
superimposed on the averaged data for  $t \geq 18$  hours in Fig 6B, D and F. Again, a 345  
visual comparison of the match between the linear regression and the data in the 346  
growth phase suggests that the putative linear relationship is reasonable. 347

In summary, we have used the per capita growth rate information in Fig 4 to make 348  
a distinction between the disturbance phase and the growth phase in the scratch assay. 349  
These differences are highlighted in the schematic in Fig 5. Furthermore, guided by 350  
the observed relationship between the per capita growth rate and the density in the 351  
proliferation assay we assume that the logistic growth model applies and fit a straight 352  
line to the per capita growth rate data and find that the match between the data and 353  
the straight line appears to be reasonable. Similarly, we assume that the logistic 354  
growth model applies to the growth phase in the scratch assay, for  $t \geq 18$  hours. 355  
Fitting a straight line to the per capita growth data suggests that the logistic growth 356  
model is reasonable in the growth phase for the scratch assay. Now that we have used 357  
the per capita growth rate data to identify the disturbance and growth phases in the 358  
scratch assay, as well as providing evidence that cells proliferate logistically in the 359  
growth phase, we re-examine the cell density profiles with a view to estimating  $\lambda$  and 360  
 $K$ . 361

## The logistic growth model

To calibrate the logistic growth model to our data from the proliferation assay, we match the solution of Eq (1) to the averaged data in Fig 3A, C and E over the entire duration of the experiment,  $0 \leq t \leq 48$  hours. To calibrate the logistic growth model to our data from the scratch assay, accounting for the differences in the disturbance and growth phases, we match the solution of Eq (1) to the averaged data in Fig 3B, D and F during the growth phase only,  $18 \leq t \leq 48$  hours. This provides us with six estimates of  $\bar{\lambda}$  and  $\bar{K}$ . To demonstrate the quality of the match between the experimental data and the calibrated logistic model, we superimpose the experimental data and Eq (2) with  $\lambda = \bar{\lambda}$  and  $K = \bar{K}$ , for each initial seeding condition and for both assays in Fig 7. These results show that the quality of match between the solution of the calibrated model and the experimental data is excellent. Our estimates of  $\lambda$  and  $K$  are summarised in Tables 1 and 2 for the proliferation assay and the scratch assay, respectively. In summary, our estimates of  $\lambda$  vary within the range  $\lambda = 0.050 - 0.067 \text{ h}^{-1}$ , and our estimates of  $K$  vary within the range  $K = 1.6 - 2.5 \times 10^{-3} \text{ cells}/\mu\text{m}^2$ . Strictly speaking, since  $\lambda$  and  $K$  are supposed to be constants in Eq (1), the fact that we see only a relatively small variation in our estimates of these parameters is encouraging. In particular, we also report, in Tables 1 and 2, the sample standard deviation showing the variability of our estimates. Overall, we find that the coefficient of variation is approximately 10%, which is relatively small when dealing with this kind of biological data [28].

**Table 1.** Estimates of  $\bar{\lambda}$  and  $\bar{K}$  for the proliferation assay using data from  $0 \leq t \leq 48$  hours. All parameter estimates are given to two significant figures. Results are reported as the sample mean and the uncertainty is quantified in terms of the sample standard deviation.

| Initial seeding condition | $\bar{\lambda}$ (/h) | $\bar{K}$ (cells/ $\mu\text{m}^2$ )       |
|---------------------------|----------------------|-------------------------------------------|
| 1                         | $0.052 \pm 0.004$    | $2.0 \times 10^{-3} \pm 8 \times 10^{-5}$ |
| 2                         | $0.059 \pm 0.006$    | $1.8 \times 10^{-3} \pm 6 \times 10^{-5}$ |
| 3                         | $0.067 \pm 0.009$    | $1.6 \times 10^{-3} \pm 2 \times 10^{-5}$ |
| Average                   | $0.059 \pm 0.008$    | $1.8 \times 10^{-3} \pm 2 \times 10^{-4}$ |

We now explore how our estimates of  $\lambda$  and  $K$  are sensitive to whether or not we

**Table 2.** Estimates of  $\bar{\lambda}$  and  $\bar{K}$  for the scratch assay using data from  $18 \leq t \leq 48$  hours. All parameter estimates are given to two significant figures. Results are reported as the sample mean and the uncertainty is quantified in terms of the sample standard deviation.

| Initial seeding condition | $\bar{\lambda}$ (/h) | $\bar{K}$ (cells/ $\mu\text{m}^2$ )       |
|---------------------------|----------------------|-------------------------------------------|
| 1                         | $0.051 \pm 0.009$    | $2.1 \times 10^{-3} \pm 2 \times 10^{-3}$ |
| 2                         | $0.059 \pm 0.02$     | $2.4 \times 10^{-3} \pm 1 \times 10^{-3}$ |
| 3                         | $0.050 \pm 0.008$    | $2.5 \times 10^{-3} \pm 2 \times 10^{-4}$ |
| Average                   | $0.053 \pm 0.005$    | $2.3 \times 10^{-3} \pm 2 \times 10^{-4}$ |

account for the differences in the disturbance and growth phases in the scratch assay. We repeat the same calibration process as described for the results in Fig 7, except now we take the standard, naive approach and calibrate the solution of Eq (1) to the averaged data in Fig 3B, D and F over the entire duration of the scratch assay,  $0 \leq t \leq 48$  hours. This procedure provides us with three additional estimates of  $\bar{\lambda}$  and  $\bar{K}$  for the scratch assay, as summarised in Table 3. To demonstrate the quality of the match between the experimental data and the calibrated logistic model, we superimpose the experimental data and Eq (2) with  $\lambda = \bar{\lambda}$  and  $K = \bar{K}$ , for each initial seeding condition and for both assays in Fig 8. These results show that the quality of the match between the solution of the calibrated logistic growth equation and the experimental data is also excellent. Indeed, when we visually compare the quality of the match between the experimental data in Fig 7 and Fig 8, and the corresponding calibrated solution of the logistic equation, there does not appear to be any significant difference at all. However, when we examine the estimates of  $\bar{K}$  and  $\bar{\lambda}$  in Table 3, the importance of properly accounting for the disturbance phase in the scratch assay becomes strikingly obvious. For example, taking this latter approach, our estimates of the carrying capacity vary within the range  $K = 1.6 \times 10^{-3} - 2.8 \times 10^7$  cells/ $\mu\text{m}^2$ , and our estimates of the proliferation rate vary within the range  $\lambda = 0.019 - 0.067$  h $^{-1}$ . We find that the results of the Levenberg–Marquardt algorithm are robust, returning the same least–squares estimates for any positive initial estimate of  $K$  and  $\lambda$  in the iterative algorithm [25].

Comparing the ranges of estimates for  $\lambda$  and  $K$  in Tables 2 and 3 shows that the model calibration procedure is extremely sensitive. For example, our range of

**Table 3.** Estimates of  $\bar{\lambda}$  and  $\bar{K}$  for the scratch assay using data from  $0 \leq t \leq 48$  hours. All parameter estimates are given to two significant figures. Results are reported as the sample mean and the uncertainty is quantified in terms of the sample standard deviation.

| Initial seeding condition | $\bar{\lambda}$ (/h) | $\bar{K}$ (cells/ $\mu\text{m}^2$ )    |
|---------------------------|----------------------|----------------------------------------|
| 1                         | $0.028 \pm 0.001$    | $2.8 \times 10^7 \pm 1 \times 10^7$    |
| 2                         | $0.029 \pm 0.005$    | $8.7 \times 10^{-3} \pm 3 \times 10^6$ |
| 3                         | $0.019 \pm 0.0002$   | $1.6 \times 10^7 \pm 6 \times 10^6$    |
| Average                   | $0.025 \pm 0.006$    | $1.5 \times 10^7 \pm 1 \times 10^7$    |

estimates of  $K$  when we account for the disturbance phase is smaller than a factor of two amongst the six estimates. In contrast, when we neglect the disturbance phase, our estimates of  $K$  vary across more than ten orders of magnitude amongst the six estimates. Similarly, our range of estimates of  $\lambda$  when we account for the disturbance phase is smaller than a factor of 1.5 among the six estimates. Again, in contrast, when we take a standard approach and neglect the disturbance phase our estimates of  $\lambda$  vary by more than a factor of three amongst the six estimates.

## Conclusions

In this work we investigate the suitability of the logistic growth model to describe the proliferation of cells in scratch assays. Scratch assays are routinely used to study the ability of a population of cells to re-colonise an initially vacant region on a two-dimensional substrate [1–4]. Most experimental interpretations of scratch assays are made using relatively straightforward measurements [1]. However, to provide additional insights into the mechanisms involved in the re-colonisation process, some previous studies have calibrated the solution of a reaction–diffusion equation to data from a scratch assay [5, 6, 9–16]. In these reaction–diffusion equations, it is commonly assumed that carrying capacity–limited proliferation of cells can be described by a logistic growth model. However, the suitability of this assumption is rarely examined beyond the process of simply calibrating the solution of the relevant model to match the experimental data.

To examine the suitability of the logistic growth model, we perform a series of scratch assays and proliferation assays for three different initial cell densities. Cell



proliferation assays are prepared in exactly the same way as a scratch assay, except that the monolayer of cells is not scratched. This allows us to treat the cell proliferation assays as a control experiment so that we can examine whether the process of artificially scratching the monolayer of cells affects the way that cells proliferate, even when those cells are located far away from the scratch. Instead of examining the dynamics of the cell density near the scratched region where there will be a net flux of cells into the vacant region [15], we quantify the cell density in two subregions that are located far behind the location of the scratch, where the cell density is approximately spatially uniform (Supplementary Material). This means that the temporal dynamics of the cell density in these subregions is due to cell proliferation only [16].

We plot the time evolution of cell density, far away from the initially scratched region, in both the scratch and proliferation assays. To examine whether our results are sensitive to the initial density of cells, we repeat each experiment using three different initial cell densities. Plots of the evolution of the cell density are given over a total duration of 48 hours, and these plots appear to correspond to a series of sigmoid curves. At this point it would be possible to simply calibrate the solution of the logistic growth model to these data to provide an estimate of the proliferation rate,  $\lambda$ , and the carrying capacity density,  $K$ . This is a standard approach that has been used by us [16] and many others [2, 10, 11]. However, while this standard calibration procedure can be used to provide estimates of the parameters, this model calibration procedure does not provide any validation that logistic growth is relevant [26].

Rather than calibrating the logistic growth model to our experimental data, we attempt to assess the suitability of the logistic growth model by converting the cell density evolution profiles into plots of the per capita growth rate as a function of density. We find that the plots of the per capita growth rate as a function of density reveal several key differences between the scratch and proliferation assays. If the logistic growth model is valid, then we expect to see a decreasing linear relationship between the per capita growth rate and the cell density for the entire duration of the experiment. While the plots of the per capita growth rate as a function of density for the proliferation assays appear to be consistent with the logistic model, the per capita growth rate data for the scratch assays are very different. For the scratch assay data,

the per capita growth rate increases with cell density at low density during the early 461  
part of the experiment. This behaviour, which is observed for all three initial densities 462  
of cells in the scratch assays, is the opposite of what we would expect if the logistic 463  
growth model were valid. However, at higher cell densities during the latter part of 464  
the experiment, we observe that the per capita growth rate in the scratch assays 465  
appears to decrease, approximately linearly, with the cell density. This motivates us to 466  
propose that cell proliferation in a scratch assay involves two phases: (i) a *disturbance* 467  
*phase* in which proliferation does not follow the logistic growth model during the early 468  
part of the experiment; and, (ii) a *growth phase* where proliferation is approximately 469  
logistic during the latter part of the experiment. Guided by our per capita growth rate 470  
data, it appears that the disturbance phase in the scratch assays lasts for 471  
approximately 18 hours before the growth phase commences. 472

To estimate the parameters in the logistic growth model, we calibrate the solution 473  
of the model to our cell proliferation data for the entire duration of the experiment. 474  
This calibration procedure gives estimates of  $\lambda$  and  $K$  that are approximately 475  
consistent across the three initial conditions. We then calibrate the solution of the 476  
logistic growth model to the data from the growth phase in the scratch assay. This 477  
procedure also gives estimates of  $\lambda$  and  $K$  that are consistent across the three initial 478  
conditions, as well as being consistent with the estimates obtained from the cell 479  
proliferation assays. In contrast, if we take a naive approach and simply calibrate the 480  
solution of the logistic growth equation to the scratch assay data for the entire 481  
duration of the experiment, our estimates of  $\lambda$  and  $K$  vary wildly, despite the fact that 482  
the match between the experimental data and the calibrated solution of the logistic 483  
growth equation looks very good. 484

The results of our study strongly suggest that care ought to be taken when 485  
applying a logistic growth model, or a reaction-diffusion equation with a logistic 486  
source term, to describe scratch assays. Simply calibrating a mathematical model to 487  
experimental data might appear to produce an excellent match between the solution of 488  
the model and the experimental data, but this commonly-used procedure does not 489  
guarantee that the model is at all relevant [26]. Our results suggest that cell 490  
proliferation is impacted by the scratching procedure in a scratch assay, and that we 491  
require some time to pass before the disturbance phase ends. This is important 492

because previous applications of logistic growth models and reaction-diffusion equations with logistic source terms have been calibrated to data from scratch assays without any regard for the disturbance phase [2, 10, 15, 16].

It is also relevant to note that for the particular cell line we use, the disturbance phase that we identify lasts for approximately 18 hours. This is important because many scratch assays are performed for relatively short periods of time [1] and it is possible that standard experimental protocols do not allow for a sufficient amount of time to pass for the disturbance phase to end. Therefore, we suggest that scratch assays should be maintained for as long as possible so that sufficient time is allowed for the disturbance phase to pass.

One of the limitations of our study is that we have not identified the precise mechanism that causes the disturbance phase; however it seems clear that the process of scratching a monolayer of cells has some impact on the proliferative behaviour of the cells away from the scratch, suggesting that either chemical or mechanical disturbance is transported throughout the experimental well as consequence of the scratching action. Regardless of the mechanism at play, our procedure of converting the cell density profiles into plots of the per capita growth rate allows us to identify the result of this disturbance. Another limitation of our work is that we deal only with one particular cell line, and it is not obvious how our estimate of the duration of the disturbance phase will translate to other cell lines. Regardless of these limitations, we suggest that our experimental procedure and data analysis can be repeated for scratch assays using different cell lines so that other researchers can explore how these issues apply in each case.

## References

1. Liang CC, Park AY, Guan JL. *In vitro* scratch assay: a convenient and inexpensive method for analysis of cell migration *in vitro*. Nat Protoc. 2007; 2: 329–333.
2. Tremel A, Cai A, Tirtaatmadja N, Hughes BD, Stevens GW, Landman KA, et al. Cell migration and proliferation during monolayer formation and wound healing. Chem Eng Sci. 2009; 64: 247–253.

3. Kramer N, Walzl A, Unger C, Rosner M, Krupitza G, Hengstschlager M, et al. *In vitro* cell migration and invasion assays. *Mutat Res Rev Mutat Res*. 2013; 752: 10–24.
4. Treloar KK, Simpson MJ. Sensitivity of edge detection methods for quantifying cell migration assays. *PLOS ONE*. 2013; 8: e67389.
5. Maini PK, McElwain DLS, Leavesley DI. Traveling wave model to interpret a wound–healing cell migration assay for human peritoneal mesothelial cells. *Tissue Eng*. 2004; 10: 475–482.
6. Maini PK, McElwain DLS, Leavesley D. Travelling waves in a wound healing assay. *Appl Math Lett*. 2004; 17: 575–580.
7. Jones LJ, Gray M, Yue ST, Haugland RP, Singer VL. Sensitive determination of cell number using the CyQUANT<sup>®</sup> cell proliferation assay. *J Immunol Methods*. 2001; 254: 85–98.
8. Simpson MJ, Binder BJ, Haridas P, Wood BK, Treloar KK, McElwain DLS, et al. Experimental and modelling investigation of monolayer development with clustering. *Bull Math Biol*. 2013; 75: 871–889.
9. Sheardown H, Cheng YL. Mechanisms of corneal epithelial wound healing. *Chem Eng Sci*. 1996; 51: 4517–4529.
10. Cai AQ, Landman KA, Hughes BD. Multi–scale modeling of a wound–healing cell migration assay. *J Theor Biol*. 2007; 245: 576–594.
11. Sengers BG, Please CP, Oreffo RO. Experimental characterization and computational modelling of two–dimensional cell spreading for skeletal regeneration. *J R Soc Interface*. 2007; 4: 1107–1117.
12. Savla U, Olson LE, Waters CM. Mathematical modeling of airway epithelial wound closure during cyclic mechanical strain. *J Appl Physiol*. 2004; 96: 566–574.
13. Shakeel M, Matthews PC, Graham RS, Waters SL. A continuum model of cell proliferation and nutrient transport in a perfusion bioreactor. *Math Med Biol*. 2013; 30: 21–44.

14. Simpson MJ, Landman KA, K Bhaganagarapu. Coalescence of interacting cell populations. *J Theor Biol.* 2007; 247: 525–543.
15. Jin W, Shah ET, Penington CJ, McCue SW, Chopin LK, Simpson MJ. Reproducibility of scratch assays is affected by the initial degree of confluence: Experiments, modelling and model selection. *J Theor Biol.* 2016; 390: 136–145.
16. Johnston ST, Shah ET, Chopin LK, McElwain DLS, Simpson MJ. Estimating cell diffusivity and cell proliferation rate by interpreting IncuCyte ZOOM<sup>TM</sup> assay data using the Fisher–Kolmogorov model. *BMC Syst Biol.* 2015; 9: 38.
17. Laird AK. Dynamics of tumor growth. *Brit J Cancer.* 1964; 18: 490–502.
18. Zwietering MH, Jongenburger I, Rombouts FM, Van't Riet K. Modeling of the bacterial growth curve. *Appl Environ Microbiol.* 1990; 56: 1875–1881.
19. West GB, Brown JH, Enquist BJ. A general model for ontogenetic growth. *Nature.* 2001; 413: 628–631.
20. Nikolić DL, Boettiger AN, Bar–Sagi D, Carbeck JD, Shvartsman SY. Role of boundary conditions in an experimental model of epithelial wound healing. *Am J Physiol Cell Physiol.* 2006; 291: C68–C75.
21. Nishio T, Kawaguchi S, Yamamoto M, Iseda T, Kawasaki T, Hase T. Tenascin–C regulates proliferation and migration of cultured astrocytes in a scratch wound assay. *Neuroscience.* 2005; 132: 87–102.
22. Kaighn ME, Narayan KS, Ohnuki Y, Lechner JF, Jones LW. Establishment and characterization of a human prostatic carcinoma cell line (PC–3). *Invest Urol.* 1979; 17: 16–23.
23. Louis KS, Siegel AC. Cell Viability Analysis Using Trypan Blue: Manual and Automated Methods. In: Stoddart JM, editor. *Mammalian Cell Viability: Methods and Protocols.* Totowa, NJ: Humana Press; 2011. pp. 7–12.
24. Adobe Systems Incorporated. Count objects in an image. 2016. Available <http://helpx.adobe.com/photoshop/using/counting-objects-image.html>.

25. MathWorks. Solve nonlinear curve-fitting (data-fitting) problems in least-squares sense. MathWorks. 2016. Available:  
<http://au.mathworks.com/help/optim/ug/lsqcurvefit.html>.
26. Simpson MJ, Sharp JA, Baker RE. Distinguishing between mean-field, moment dynamics and stochastic descriptions of birth-death-movement processes. *Physica A*. 2014; 395: 236–246.
27. Chapra SC, Canale RP. Numerical methods for engineers. 6th ed. Boston: McGraw-Hill; 2010.
28. Vo BN, Drovandi CC, Pettitt AN, Simpson MJ. Quantifying uncertainty in parameter estimates for stochastic models of collective cell spreading using approximate Bayesian computation. *Math Biosci*. 2015; 263: 133–142.

## Figure Legends

**Fig 1. Experimental images.** (A)–(C) A summary of IncuCyte ZOOM™ experiments for proliferation assays. (D)–(F) A summary of IncuCyte ZOOM™ experiments for scratch assays. Images show both types of experiments initiated with 16,000 cells per well. The time at which the image is recorded is indicated on each subfigure, and the scale bar (red line) corresponds to  $300\mu\text{m}$ . The image in (D), at  $t = 0$  hours, shows the approximate location of the position of the leading edges (dashed green). (G)–(I) To quantify the cell density profile, two rectangles of width  $200\mu\text{m}$ , are superimposed on the experimental image as shown in (G). Manual cell counting is used to estimate the number of cells in each subregion, and these estimates are converted into an estimate of cell density in these regions at two-hour intervals during the first 18 hours of the experiment, and then at six-hour intervals during the remaining 30 hours of the experiment. To count individual cells we zoom in to focus on certain subregions, such as shown in (H), which corresponds to the yellow rectangle highlighted in (G). Using the counting features in Adobe Photoshop [24], we identify individual cells and place a unique marker on each cell (red disk), as shown in (H). After each image is processed in this way we have identified the total number of cells in the two subregions in the image, as shown in (I), and then we convert these estimates of cell numbers into an estimate of cell density.



**Fig 2. Variation of initial cell densities.** Initial cell densities in the 96 replicates of proliferation and scratch assays. Results for the three different initial seeding conditions are shown. Initial seeding condition 1 corresponds to 12,000 cells per well; initial seeding condition 2 corresponds to 16,000 cell per well; and initial seeding condition 3 corresponds to 20,000 cells per well. For each initial seeding condition, each experiment is repeated  $n = 16$  times and the variation in initial cell density is illustrated by comparing the spread of estimates of cell density on the horizontal axis. Each blue square represents an individual replicate of the proliferation assay, and each red circle represents an individual replicate of the scratch assay. The 18 black triangles indicate the individual replicates chosen to construct the cell density information.

**Fig 3. Temporal evolution of cell density.** Results in (A)–(F) correspond to proliferation and scratch assays initiated with 12,000 (initial seeding condition 1); 16,000 (initial seeding condition 2); and, 20,000 (initial seeding condition 3) cells per well, as indicated. Cell density profiles are shown at two-hour intervals during the first 18 hours, and at six-hour intervals during the remaining 30 hours of the experiment. For each experiment, we report results for three identically prepared experimental replicates, and the average of these three data sets is also shown.

**Fig 4. Per capita growth rates as a function of cell density.** Results in (A)–(F) correspond to proliferation and scratch assays initiated with 12,000 (initial seeding condition 1); 16,000 (initial seeding condition 2); and, 20,000 (initial seeding condition 3) cells per well, as indicated. Per capita growth rate data is calculated using the data in Fig 3. For each experiment, we report results for three identically prepared experimental replicates, and the average of these three experimental replicates is also shown.

**Fig 5. Schematic illustration of the differences between the proliferation and scratch assays.** (A) Schematic showing the per capita growth rate as a function of density for the proliferation assays. (B) Schematic of the per capita growth rate for the scratch assays illustrating two phases of proliferation. The solid blue line indicates the disturbance phase in the scratch assay, and the solid green line indicates the growth phase in both the proliferation and scratch assays. The arrow heads indicate the direction of increasing time.

**Fig 6. Straight line fit to per capita growth rates in the growth phase.**

Results in (A)–(F) show the average per capita growth rate data as a function of density for both proliferation and scratch assays initiated with 12,000 (initial seeding condition 1); 16,000 (initial seeding condition 2); and, 20,000 (initial seeding condition 3) cells per well, as indicated. Green dots correspond to averaged data in the growth phase (Fig 5), and blue dots correspond to averaged data in the disturbance phase (Fig 5). The solid lines show the best fit linear relationship between the averaged per capita growth rate and averaged density. The best fit straight line is obtained for 0–48 hours in the proliferation assays, and for 18–48 hours in the scratch assays.

**Fig 7. Calibrated solutions of the logistic growth equation using data from the growth phase.** Results in (A)–(F) correspond to proliferation and scratch assays initiated with 12,000 (initial seeding condition 1); 16,000 (initial seeding condition 2); and, 20,000 (initial seeding condition 3) cells per well, as indicated. For each type of experiment the calibrated solution of the logistic growth equation (solid line) is compared to the experimental data in the growth phase (18–48 hours for scratch assays and 0–48 hours for proliferation assays). The least-squares estimates of  $\bar{\lambda}$  and  $\bar{K}$  are shown.

**Fig 8. Calibrated solutions of the logistic growth equation using the entire data set.** Results in (A)–(F) correspond to proliferation and scratch assays initiated with 12,000 (initial seeding condition 1); 16,000 (initial seeding condition 2); and, 20,000 (initial seeding condition 3) cells per well, as indicated. For each type of experiment the calibrated solution of the logistic growth equation (solid line) is compared to the entire experimental data set. The least-squares estimates of  $\bar{\lambda}$  and  $\bar{K}$  are shown.

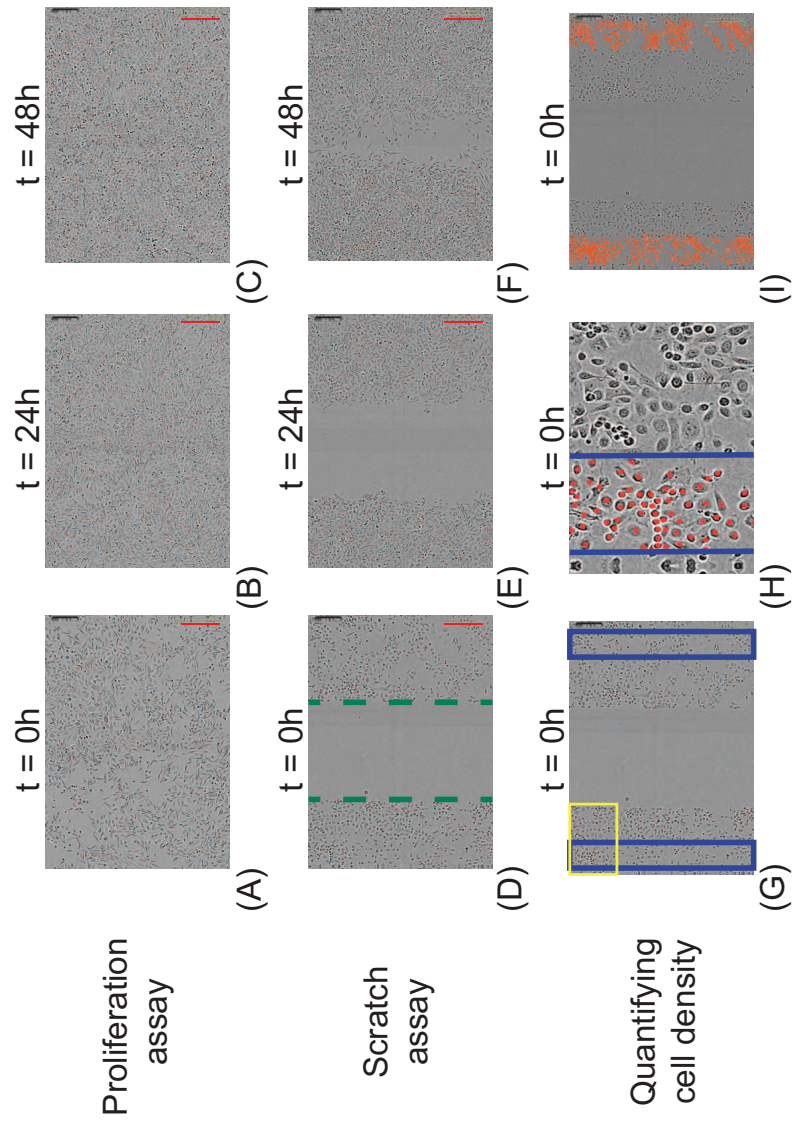

Fig 1



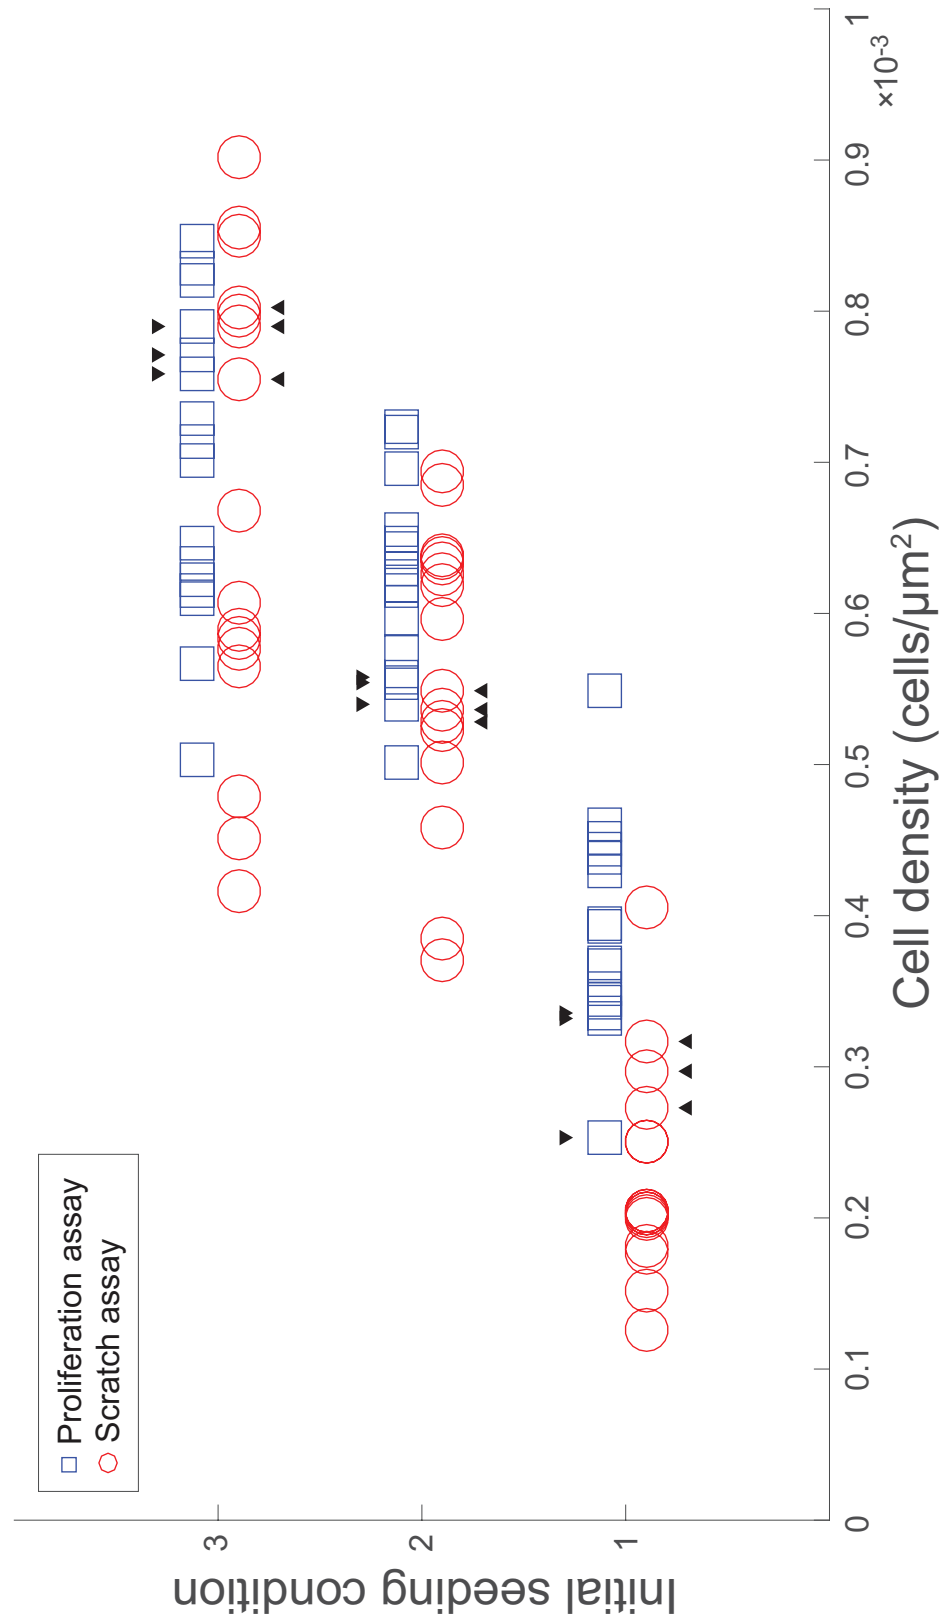

Fig 2

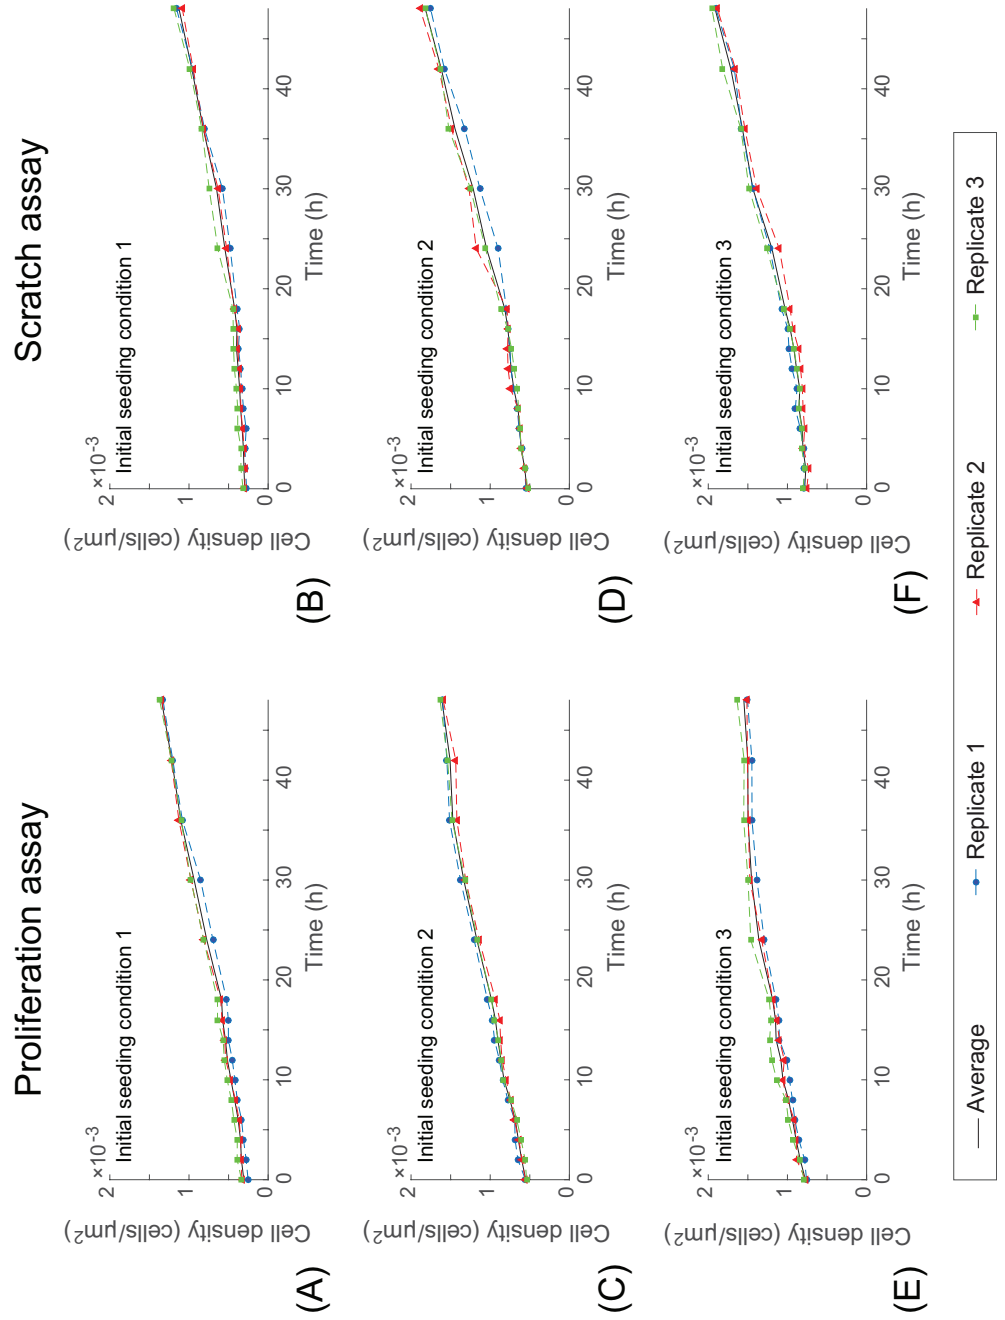

Fig 3

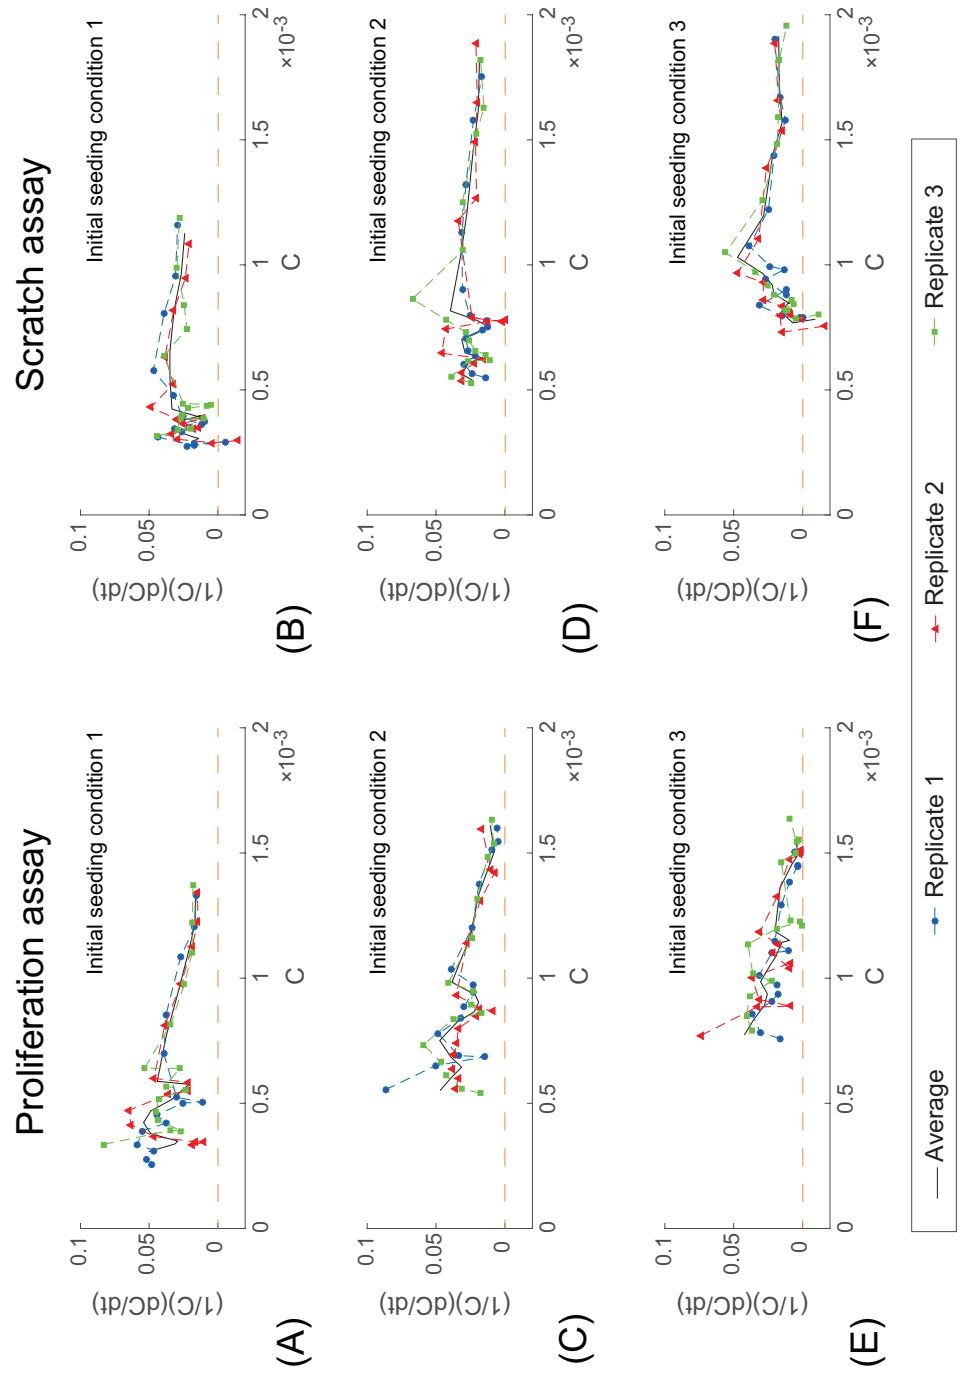

Fig 4

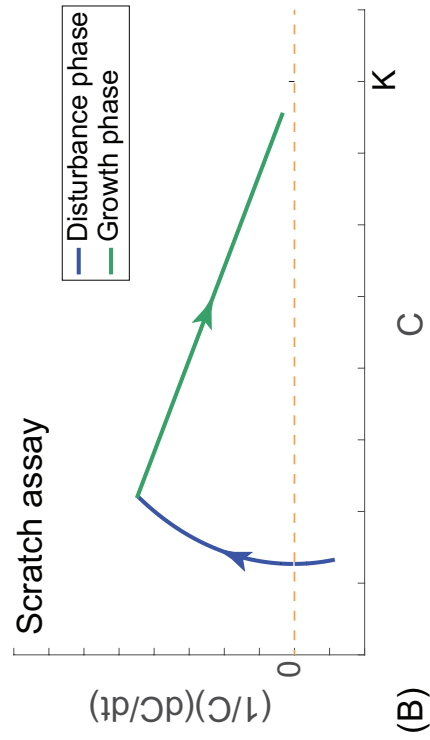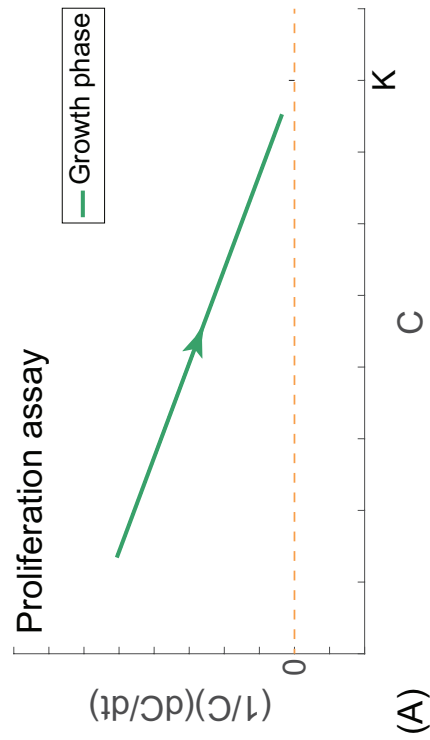

Fig 5

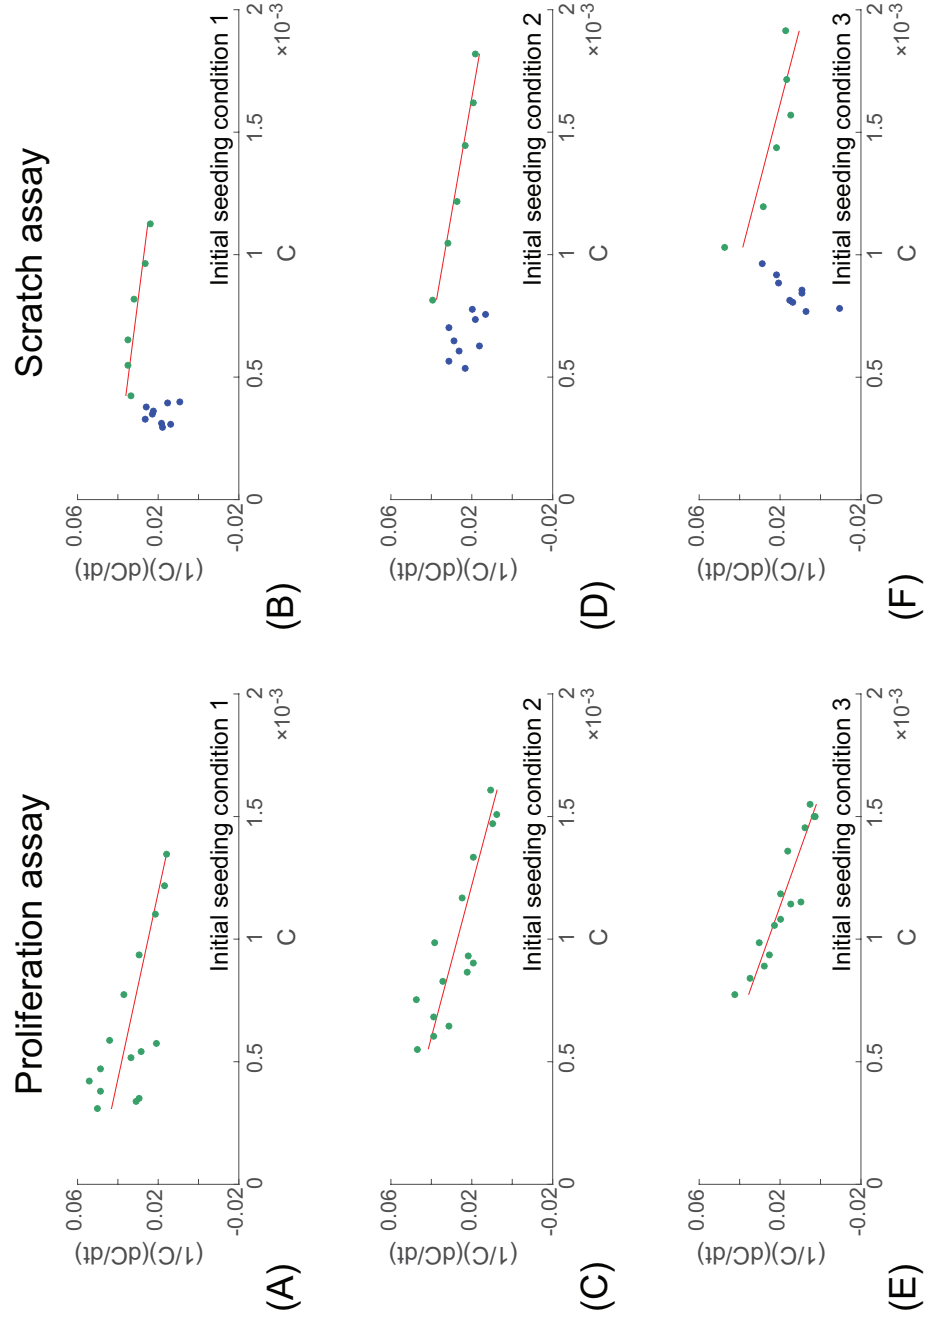

Fig 6

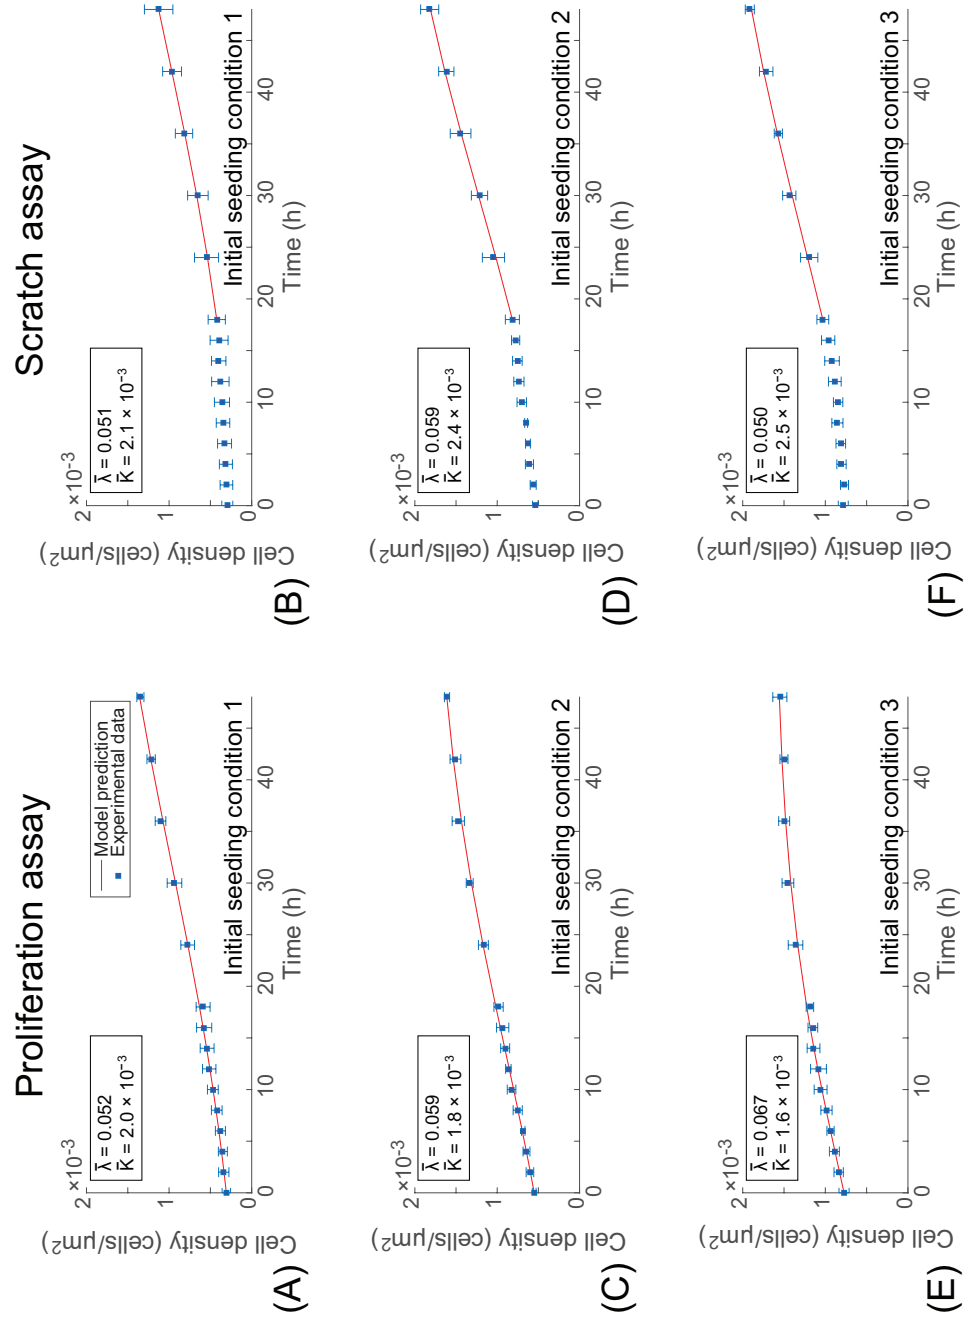

**Fig 7**

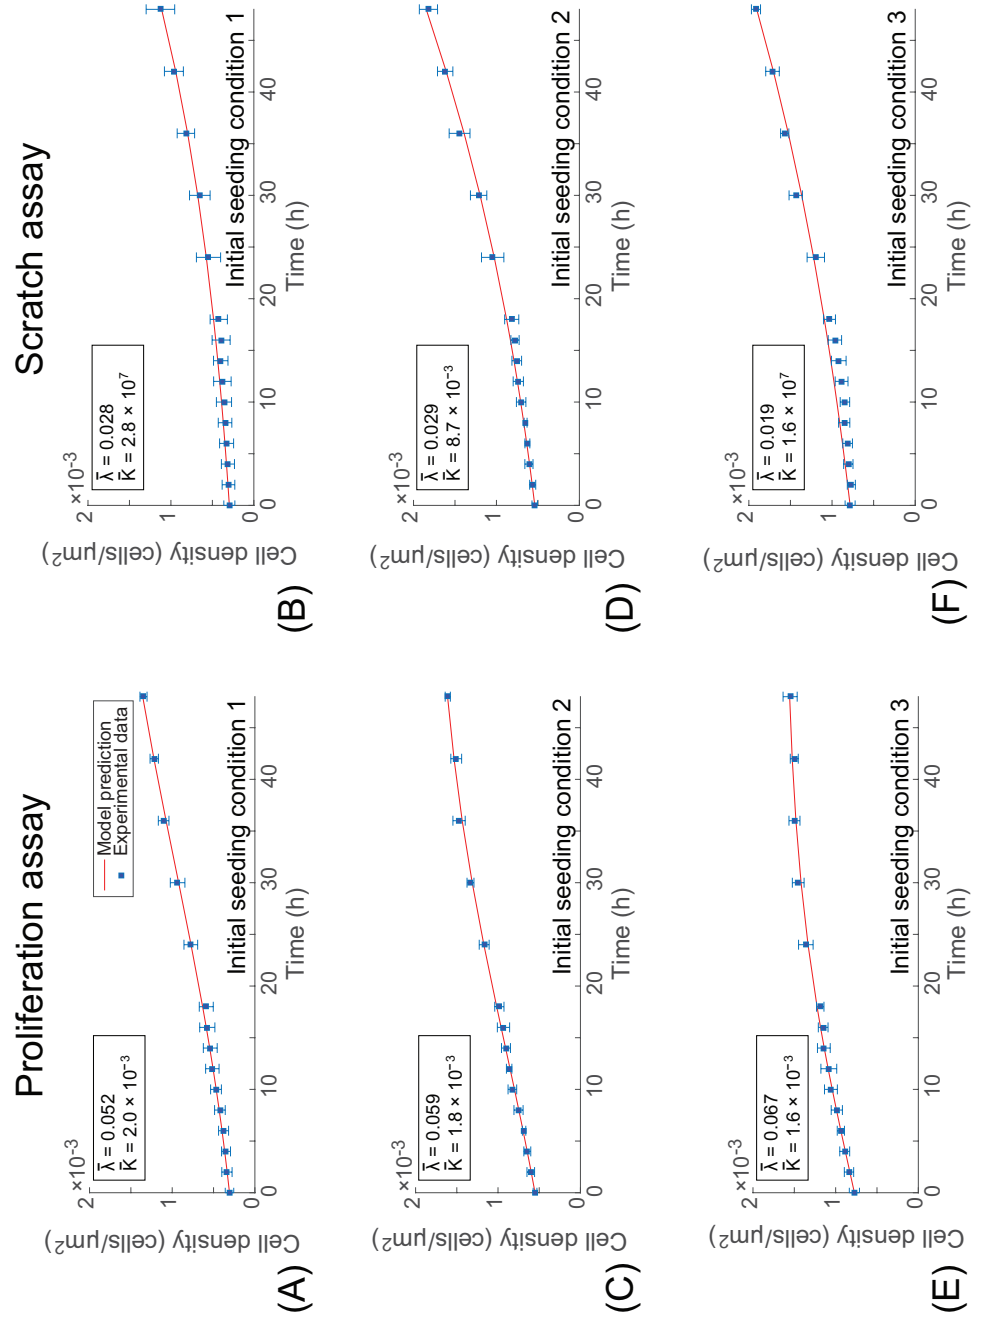

Fig 8
